# Supplementary material
Source: publisher figshare collection journal article supplement (https://tandf.figshare.com/ndownloader/files/18737276)
Supplement: Supplementary file 1 [file 18737276]

# Appendix 1

Mean frequency and taxa recorded in La Croisière site in Donzère-Mondragon in the Lower Rhône valley, Southeastern France. Values correspond to the mean frequency of each taxa for each treatment over three years (2014-2016). CG = cleared areas grazed by goats, CF = cleared fenced areas, G = not cleared areas only grazed by goats, C = not cleared and not grazed areas.

| **Taxa** | **Site 3** | | | |
| --- | --- | --- | --- | --- |
| **CG** | **CF** | **G** | **C** |
| ***Agrimonia eupatoria* L.** | 0.01 | - | - | - |
| ***Anacamptis pyramidalis* (L.) Rich.** | 0.07 | - | - | - |
| ***Anisantha diandra* (Roth) Tutin ex Tzvelev** | - | 0.07 | - | - |
| ***Anisantha madritensis* (L.) Nevski** | 0.55 | - | 0.07 | - |
| ***Anisantha sterilis* (L.) Nevski** | 0.95 | 0.13 | 0.27 | - |
| ***Arctium minus* (Hill) Bernh.** | 0.04 | 0.01 | 0.01 | - |
| ***Artemisia annua* L.** | 0.01 | - | - | - |
| ***Avena barbata* Pott ex Link** | 0.07 | - | 0.07 | - |
| ***Blackstonia perfoliata* (L.) Huds.** | 0.20 | 0.15 | 0.01 | - |
| ***Brachypodium sylvaticum* (Huds.) P.Beauv.** | 3.20 | 3.13 | 1.48 | 0.21 |
| ***Bromus hordeaceus*  L.** | 0.01 | - | - | - |
| ***Bromus squarrosus* L.** | 0.01 | - | - | - |
| ***Bryonia dioica* Jacq.** | 0.37 | 0.41 | 0.33 | 0.07 |
| ***Buglossoides arvensis* (L.) I.M.Johnst.** | 0.07 | - | - | - |
| ***Carduus pycnocephalus* L.** | 0.15 | 0.01 | 0.01 | - |
| ***Carduus tenuiflorus* Curtis** | 0.07 | 0.01 | - | - |
| ***Celtis australis* L.** | 0.01 | - | - | 0.08 |
| ***Centaurium erythraea* Rafn** | 0.20 | 0.01 | - | - |
| ***Chenopodiastrum hybridum* (L.) S.Fuentes, Uotila & Borsch** | 0.07 | - | - | - |
| ***Cirsium arvense* (L.) Scop.** | 0.11 | 0.13 | 0.03 | - |
| ***Cirsium vulgare* (Savi) Ten.** | 0.08 | 0.15 | 0.01 | - |
| ***Clematis vitalba* L.** | 0.65 | 1.80 | 1.07 | 0.95 |
| ***Clinopodium acinos* (L.) Kuntze** | 0.07 | - | - | - |
| ***Clinopodium nepeta* (L.) Kuntze** | 0.31 | 0.04 | - | - |
| ***Cornus sanguinea* L.** | 0.61 | 1.40 | 0.93 | 1.87 |
| ***Cotinus coggygria* Scop.** | 0.01 | - | - | - |
| ***Crataegus monogyna* Jacq.** | 0.89 | 1.33 | 1.13 | 2.27 |
| ***Crepis foetida* L.** | 0.16 | - | 0.01 | - |
| ***Crepis pulchra* L.** | 0.08 | - | - | - |
| ***Crepis sancta* (L.) Bornm.** | - | - | 0.01 | - |
| ***Crepis vesicaria subsp. taraxacifolia* (Thuill.) Thell. ex Schinz & R.Keller** | - | - | 0.01 | - |
| ***Cynoglossum creticum* Mill.** | 0.19 | - | 0.08 | - |
| ***Dactylis glomerata* L.** | 0.20 | - | - | - |
| ***Dipsacus fullonum* L.** | - | 0.07 | - | - |
| ***Epilobium tetragonum* L.** | - | 0.01 | - | - |
| ***Erigeron* sp*.*** | 0.53 | 0.04 | 0.13 | - |
| ***Festuca ovina* L.** | - | 0.27 | - | - |
| ***Festuca rubra* L.** | - | 0.13 | - | - |
| ***Filago germanica* L.** | 0.01 | - | - | - |
| ***Fraxinus angustifolia* Vahl** | 0.07 | 0.15 | 0.01 | 0.48 |
| ***Galium aparine* L.** | 0.05 | - | 0.15 | - |
| ***Geranium dissectum* L.** | 0.03 | - | - | - |
| ***Geranium robertianum* L.** | 0.01 | - | - | - |
| ***Geum urbanum* L.** | 0.01 | - | - | - |
| ***Hedera helix* L.** | 0.44 | 0.93 | 3.80 | 5.00 |
| ***Helminthotheca echioides* (L.) Holub** | 0.01 | 0.15 | - | - |
| ***Holcus lanatus* L.** | 0.01 | 0.01 | - | - |
| ***Hordeum murinum* L.** | 0.23 | - | 0.07 | - |
| ***Hypericum perforatum* L.** | 0.20 | 0.53 | - | - |
| ***Inula conyzae* (Griess.) DC.** | 0.07 | 0.07 | - | - |
| ***Juglans regia* L.** | 0.03 | 0.04 | 0.03 | 0.05 |
| ***Lactuca virosa* L.** | 0.01 | - | - | - |
| ***Ligustrum vulgare* L.** | 0.07 | - | - | 0.17 |
| ***Lolium rigidum* Gaudin** | 0.20 | - | - | - |
| ***Lysimachia arvensis* (L.) U.Manns & Anderb.** | 0.41 | 0.13 | 0.16 | - |
| ***Martricaria* sp*.*** | 0.01 | - | - | - |
| ***Medicago lupulina* L.** | 0.21 | - | 0.13 | - |
| ***Medicago minima* (L.) L.** | 0.08 | 0.08 | - | - |
| ***Melilotus* sp*.*** | - | 0.01 | 0.01 | - |
| ***Oxalis corniculata* L.** | - | - | 0.01 | - |
| ***Pardoglossum cheirifolium* (L.) Barbier & Mathez** | 0.01 | 0.01 | - | - |
| ***Picris hieracioides* L.** | - | 0.13 | 0.07 | - |
| ***Poa pratensis* L.** | 0.13 | 0.20 | 0.01 | - |
| ***Poa trivialis* L.** | 0.37 | 0.09 | 0.13 | - |
| ***Populus alba* L.** | 0.33 | 0.59 | 0.16 | 0.64 |
| ***Populus nigra* L.** | - | - | 0.20 | 0.01 |
| ***Prunus spinosa* L.** | 0.07 | 0.07 | 0.07 | 0.03 |
| ***Quercus pubescens* Willd.** | 0.03 | - | - | 0.04 |
| ***Robinia pseudoacacia* L.** | 0.29 | 0.51 | 0.69 | 0.21 |
| ***Rosa canina* L.** | 0.16 | 0.08 | - | 0.01 |
| ***Rubia peregrina* L.** | 0.01 | - | 0.13 | 0.20 |
| ***Rubus ulmifolius* gr. Schott** | 1.93 | 2.80 | 3.87 | 1.87 |
| ***Schedonorus arundinaceus* (Schreb.) Dumort.** | 0.20 | 0.15 | - | - |
| ***Senecio vulgaris* L.** | 0.01 | - | 0.01 | - |
| ***Solanum dulcamara* L.** | 0.01 | 0.03 | 0.01 | - |
| ***Solanum* sp*.*** | - | - | 0.01 | - |
| ***Sonchus asper* (L.) Hill** | 0.17 | 0.01 | 0.07 | - |
| ***Sonchus oleraceus* L.** | 0.03 | 0.07 | 0.08 | - |
| ***Symphyotrichum subulatum* var*. squamatum* (Spreng.) S.D.Sundb.** | 0.03 | - | - | - |
| ***Taraxacum* sp*.*** | 0.03 | 0.01 | 0.03 | - |
| ***Torilis arvensis* (Huds.) Link** | 0.80 | 0.71 | 0.43 | - |
| ***Trifolium campestre* Schreb.** | - | - | 0.01 | - |
| ***Trifolium pratense* L.** | 0.01 | - | 0.01 | - |
| ***Trifolium repens* L.** | 0.07 | - | - | - |
| ***Ulmus minor* Mill.** | 0.03 | 0.28 | 0.03 | - |
| ***Verbascum thapsus* L.** | - | 0.08 | - | - |
| ***Verbena officinalis* L.** | 0.49 | 0.12 | 0.09 | - |
| ***Vicia sativa* L.** | 0.16 | 0.08 | 0.01 | - |
| ***Vulpia myuros* (L.) C.C.Gmel.** | 0.08 | - | - | - |
